# Supplementary material for: The Representation of Children’s Participation in Guidelines for Planning and Designing Public Playspaces: A Scoping Review with “Best Fit” Framework Synthesis
Source: Int J Environ Res Public Health. 2023 May 15;20(10):5823. doi: 10.3390/ijerph20105823 (PMC10218453; doi:10.3390/ijerph20105823)
Supplement: Supplementary file 1 [file ijerph-20-05823-s001.zip › ijerph-2341510-supplementary.pdf]

## **Supplement File S1: The identification, screening and selection process of the sources.**

### **Identification phase**

Four strategies were used to find the intended sources and therefore strengthening the scientific rigor of this scoping review with the gray literature: 1) search in Google, 2) search at the website of play organizations, 3) consultation of experts and 4) citation mining.

#### *Search in Google*

With the support of two librarian experts, different search engines and search strings were piloted and established for a search with the words “guidelines design play space” in the search engine Google.

After removing the search histories and checking the settings with the help of an ICT expert, the search in Google search engine was conducted on the 19<sup>th</sup> of October in Sweden. This resulted in about 388 000 hits. Each URL was opened, and when a document/website was available, the hyperlink was copied to a spreadsheet for the screening process. During this process, Google adapted continuously the number of hits as there seems to run an algorithm for removing duplicates, and after a while the number of URL’s were greatly reduced. This process resulted in 203 hyperlinks.

#### *Search at websites of play organizations*

The research team consulted the websites of organizations supporting children’s play in the community, which they are familiar with. The resource section of the websites was assessed on the availability of a guideline for designing a public playspace. The following websites were assessed in October 2021.

|               |                                                                                 |
|---------------|---------------------------------------------------------------------------------|
| Play Wales    | <a href="https://www.playwales.org.uk/eng">https://www.playwales.org.uk/eng</a> |
| Play Scotland | <a href="https://www.playscotland.org">https://www.playscotland.org</a>         |

|                                 |                                                                                     |
|---------------------------------|-------------------------------------------------------------------------------------|
| Play Australia                  | <a href="https://www.playaustralia.org.au">https://www.playaustralia.org.au</a>     |
| Play Canada                     | <a href="https://playcanada.ca">https://playcanada.ca</a>                           |
| Play England                    | <a href="https://www.playengland.org.uk">https://www.playengland.org.uk</a>         |
| UNICEF                          | <a href="https://www.unicef.org/">https://www.unicef.org/</a>                       |
| Be active kids                  | <a href="http://www.beactivekids.org/">http://www.beactivekids.org/</a>             |
| The National Institute for play | <a href="http://nifplay.org">http://nifplay.org</a>                                 |
| Free Play                       | <a href="http://www.freeplaynetwork.org.uk/">http://www.freeplaynetwork.org.uk/</a> |

This process yielded five documents.

### *Consultation of experts*

The third plan in finding the appropriate sources was approaching experts with a short questionnaire through two organizations known for their network with scholars and practitioners with scientific, policy, management and/or practical expertise in designing a public playspace.

These two organizations were International Play Association and Child in the City, and an email with the following information was sent out with the request to forward it to their members:

|                                                                                                                                                                                                                                                                                                                |
|----------------------------------------------------------------------------------------------------------------------------------------------------------------------------------------------------------------------------------------------------------------------------------------------------------------|
| Introduction with the relevance, aim and research questions of the study clarifying the reason for sending the request to the person.                                                                                                                                                                          |
| <p>1) Are you aware of a guideline for (re)design public playspaces? What is its name?</p> <p>Clarification on concepts used:</p> <ul style="list-style-type: none"> <li>- Guideline is a document/report for a design team with advice for the design team (not a blog or video clip with advice).</li> </ul> |

- The advice is about designing a playspace (not about safety or maintenance regulations, not about COVID-19 regulations and not about how children/adults should behave at the playspace).
  - The guideline is meant to be used in communities or municipalities (not for school or kindergarten playspaces).
- 2) If yes, is there an English version of it?
  - 3) Can you share this guideline with the research team for being incorporated in the study? (via link or attachment).

If questions or thoughts will come up regarding your answers, are we allowed to contact you? If so, what is your preferred way?

Eight experts contributed to finding the sources, including two persons from New Zealand, one person from United States of America, one person from Hong Kong, one person from Australia, two persons from Ireland and one person from Scotland, the United Kingdom, which yielded in 130 documents or URL links. This identification strategy resulted in 130 documents or URLs.

#### *Citation mining*

The citations of the sources retrieved via the three former search strategies were examined manually. Likewise, the reference list of studies deployed in describing the rationale for this scoping review was examined. This process resulted in zero results.

#### **Screening phase**

The identified sources were assessed with the inclusion criteria of an English-language source and describing designing a public playspace. Excluded were sources describing designing playgrounds in (nursery) schools or day-care centers because they are not always accessible to citizens as well as books and book chapters because municipal design teams are unlikely to use them.

*Identified sources from Google search.*

The Google search generated 183 from 203 sources for being screened according to inclusion criteria screening. Records were excluded as 6 URLs could not be opened and 16 duplicates were removed.

The screening phased yielded 39 sources. Reasons for exclusion were the source was not about play (n= 6), the source was not about a playspace (n= 18), the source was not about a public playspace but about a playspace for example for a school or kindergarten (n=27) and the source was not about designing a public playspaces but for example about safety or not a guideline but a blog about a new designed playground (n=91).

*Identified sources through search at websites of play organizations.*

This screening of the five sources showed five documents eligible for assessment on children's participation or an umbrella concept.

*Identified sources through consultation of experts.*

The 130 identified documents or URLs provided by experts yielded 94 records after removing 16 duplicates and 20 unopenable URLs for screening against the inclusion criteria.

This screening process resulted in 48 sources identified as a guideline for designing a public playspace. The exclusion reasons were 20 pages or URLs were not found, 16 duplicates were removed, 6 sources were not about play but addressing children's health and well-being, 8 sources were not addressing a public playspace but a playspace at kindergarten or school and 32 sources could not be identified as a description for designing a playspace but were addressing other aspects about play in the community such as a strategy for improving play provision.

### **Selection phase**

The selected sources from the screening phase, a total of 92 out of 3 search sources, were first checked for duplications. The remaining 76 sources were selected when children's participation or parts of it as described in Article 12 of the United Nations Convention on the Rights of the Child, or umbrella concepts were addressed.

This process resulted in 42 guidelines for designing a public playspace that describe children's participation, community involvement or stakeholder consultation.

**Supplement File S2: Additional information to Table 1 (A descriptive summary of the included guidelines)**

| No. | Affiliated institution or organization | Year of publication | Authors       | Seize document | Topics addressed                                                                                                                                                                               | Special focus                             | Reference to UN CRC | Assessment quality with ACE tool | URL                                                                                                                                                                                                                                                     |
|-----|----------------------------------------|---------------------|---------------|----------------|------------------------------------------------------------------------------------------------------------------------------------------------------------------------------------------------|-------------------------------------------|---------------------|----------------------------------|---------------------------------------------------------------------------------------------------------------------------------------------------------------------------------------------------------------------------------------------------------|
| 1   | Australian Heart Foundation            | 2013                | not described | 40 pages       | child-centered approach, project elements, project methodology, evaluation methodology, older children's voices, design process, site construction and evaluation and planning for active play | playspaces for older children, 8-12 years | Art 31              | minor concerns                   | <a href="https://fdocuments.in/document/space-for-active-play-healthy-active-by-the-design-of-play-spaces-for-the.html?page=1">https://fdocuments.in/document/space-for-active-play-healthy-active-by-the-design-of-play-spaces-for-the.html?page=1</a> |
| 2   | CABE                                   | 2008                | not described | 8 pages        | state of play, planning for play, designing for play, back to nature and principles for designing play and case studies                                                                        |                                           |                     | serious concerns                 | <a href="https://www.designcouncil.org.uk/fileadmin/uploads/dc/Documents/designing-and-planning-for-play.pdf">https://www.designcouncil.org.uk/fileadmin/uploads/dc/Documents/designing-and-planning-for-play.pdf</a>                                   |
| 3   | Christopher and Dana Reeve Foundation  | n.d.                | not described | 20 pages       | inclusive playground, importance of play and build community pride                                                                                                                             | inclusive playspaces                      |                     | serious concerns                 | <a href="http://www.lesliemccullough.com/uploads/5/0/7/0/5070598/playground_toolkit_final.pdf">www.lesliemccullough.com/uploads/5/0/7/0/5070598/playground_toolkit_final.pdf</a>                                                                        |

|   |                             |      |                  |          |                                                                                                                                                                                                                              |                                      |                  |                                                                                                                                                                                                                       |
|---|-----------------------------|------|------------------|----------|------------------------------------------------------------------------------------------------------------------------------------------------------------------------------------------------------------------------------|--------------------------------------|------------------|-----------------------------------------------------------------------------------------------------------------------------------------------------------------------------------------------------------------------|
| 4 | City of Ballarat            | 2014 | not described    | 33 pages | current issues in outdoor play, key directions and planning framework, design guidelines, universal access and inclusion, participation and challenges in play, community engagement and site practicalities and maintenance |                                      | serious concerns | <a href="https://www.ballarat.vic.gov.au/sites/default/files/2019-04/Play%20Space%20Planning%20Framework.pdf">https://www.ballarat.vic.gov.au/sites/default/files/2019-04/Play%20Space%20Planning%20Framework.pdf</a> |
| 5 | Creo                        | n.d. | not described    | 11 pages | design, team building, formulating vision, planning for success, caring for the environment                                                                                                                                  |                                      | serious concerns | <a href="https://creospace.co.nz/council/">https://creospace.co.nz/council/</a>                                                                                                                                       |
| 6 | Denver Parks and Recreation | 2017 | not described    | 79 pages | nature benefits, site selection, public engagement, inclusion in nature play, design and construction and case studies                                                                                                       | nature play in the built environment | serious concerns | No URL available                                                                                                                                                                                                      |
| 7 | DESSA                       | 2007 | not described    | 44 pages | the importance of play, how to make sure that disabled children can participate in play, consulting with children and planning and designing a playground                                                                    | playspaces for disabled children     | serious concerns | <a href="https://www.dessa.ie/wp-content/uploads/2021/03/Play-for-All.pdf">https://www.dessa.ie/wp-content/uploads/2021/03/Play-for-All.pdf</a>                                                                       |
| 8 | Free Play Network           | 2008 | Aileen Shackler, | 32 pages | 10 principles for designing play spaces                                                                                                                                                                                      |                                      | serious concerns | <a href="http://www.freeplaynetwork.org.uk/designforplay/">www.freeplaynetwork.org.uk/designforplay/</a>                                                                                                              |

|    |                             |      |                                              |           |                                                                                                 |                                           |                   |                                                                                                                                                                                                                                                                                                 |
|----|-----------------------------|------|----------------------------------------------|-----------|-------------------------------------------------------------------------------------------------|-------------------------------------------|-------------------|-------------------------------------------------------------------------------------------------------------------------------------------------------------------------------------------------------------------------------------------------------------------------------------------------|
|    |                             |      | Nicola Butler, Phil Doyle and David Ball     |           |                                                                                                 |                                           |                   |                                                                                                                                                                                                                                                                                                 |
| 9  | Geelong Australia           | 2012 | Wendy Holland and Shaun Quayle               | 128 pages | planning and design for play spaces and play opportunities, management, marking and maintenance |                                           | moderate concerns | <a href="https://hdp-au-prod-app-ggc-yoursay-files.s3.ap-southeast-2.amazonaws.com/4316/0542/2931/8cf1e7654edc563-0220Play20Strategy20Part202.pdf">https://hdp-au-prod-app-ggc-yoursay-files.s3.ap-southeast-2.amazonaws.com/4316/0542/2931/8cf1e7654edc563-0220Play20Strategy20Part202.pdf</a> |
| 10 | Government South Australia  | n.d. | not described                                | 51 pages  | importance of inclusive play and connection through inclusive play                              | inclusive play and accessible play spaces | serious concerns  | Inclusive Play - Guidelines for accessible playspaces - Easy Read                                                                                                                                                                                                                               |
| 11 | Greater London Authority    | 2012 | Hermine Sanson, Jane Carlsen and Mike Newitt | 106 pages | policy context, quality of a play space, neighborhood planning and accessibility                |                                           | serious concerns  | <a href="https://www.london.gov.uk/sites/default/files/osd31_shaping_neighbourhoods_play_and_informal_recreation_spg_high_res_7_0.pdf">https://www.london.gov.uk/sites/default/files/osd31_shaping_neighbourhoods_play_and_informal_recreation_spg_high_res_7_0.pdf</a>                         |
| 12 | Hags                        | 2019 | not described                                | 56 pages  | planning and preparation for a play space, play value and selecting play space equipment        |                                           | serious concerns  | <a href="https://issuu.com/hags-uk/docs/hags_-_inclusive_play_-_design_guid">https://issuu.com/hags-uk/docs/hags_-_inclusive_play_-_design_guid</a>                                                                                                                                             |
| 13 | HNH (Healthy New Hampshire) | 2017 | not described                                | 66 pages  | planning framework, resources, layout and how to select playground materials                    |                                           | serious concerns  | <a href="https://issuu.com/hags-uk/docs/hags_-_inclusive_play_-_design_guid">https://issuu.com/hags-uk/docs/hags_-_inclusive_play_-_design_guid</a>                                                                                                                                             |

|    |                                                              |      |                                   |          |                                                                                                                          |                                          |                   |                                                                                                                                                                                                                                                                       |
|----|--------------------------------------------------------------|------|-----------------------------------|----------|--------------------------------------------------------------------------------------------------------------------------|------------------------------------------|-------------------|-----------------------------------------------------------------------------------------------------------------------------------------------------------------------------------------------------------------------------------------------------------------------|
|    | Foundation and NRPC (Nashua Regional Planning Commission)    |      |                                   |          | and design considerations                                                                                                |                                          |                   |                                                                                                                                                                                                                                                                       |
| 14 | Illinois Department of Natural Resources                     | 2004 | not described                     | 63 pages | definitions and terminology, planning considerations, site analysis, design and installation, maintenance and inspection |                                          | serious concerns  | <a href="https://vdocument.in/a-guide-to-playground-planning.html?page=1">https://vdocument.in/a-guide-to-playground-planning.html?page=1</a>                                                                                                                         |
| 15 | Inclusive SA (South Australia)                               | n.d. | not described                     | 40 pages | inclusive play and connection with the place, each other and with self.                                                  | inclusive play and accessible playspaces | serious concerns  | <a href="https://inclusive.sa.gov.au/__data/assets/pdf_file/0006/95460/3387-DHS-SA-Inclusive-play-case-studies-ER-FA-Accessible.pdf">https://inclusive.sa.gov.au/__data/assets/pdf_file/0006/95460/3387-DHS-SA-Inclusive-play-case-studies-ER-FA-Accessible.pdf</a>   |
| 16 | Inspiring Scotland, Play Scotland, and the Nancy Ovens Trust | 2018 | Theresa Casey and Harry Harbottle | 60 pages | key concepts and creating organized, accessible and inclusive design                                                     | Art 12<br>Art 23<br>Art 31<br>GC 17      | moderate concerns | <a href="https://www.playscotland.org/play/playful-communities/free-play-guide/">https://www.playscotland.org/play/playful-communities/free-play-guide/</a>                                                                                                           |
| 17 | Landcom                                                      | 2008 | not described                     | 56 pages | design principles, delivery, ownership and maintenance                                                                   |                                          | serious concerns  | <a href="https://www.landcom.com.au/assets/Publications/Statement-of-Corporate-Intent/612d4e710e/open-space-design-guidelines-lr.pdf">https://www.landcom.com.au/assets/Publications/Statement-of-Corporate-Intent/612d4e710e/open-space-design-guidelines-lr.pdf</a> |

|    |                                                    |      |                                            |           |                                                                                                           |                                                   |                 |                   |                                                                                                                                                                                                                                                                                                                 |
|----|----------------------------------------------------|------|--------------------------------------------|-----------|-----------------------------------------------------------------------------------------------------------|---------------------------------------------------|-----------------|-------------------|-----------------------------------------------------------------------------------------------------------------------------------------------------------------------------------------------------------------------------------------------------------------------------------------------------------------|
| 18 | Landscape Structures Inc.                          | 2018 | not described                              | 20 pages  | not described                                                                                             | inclusive playspaces                              |                 | serious concerns  | <a href="http://viewer.zmags.com/publication/c878a7ae#/c878a7ae/1">http://viewer.zmags.com/publication/c878a7ae#/c878a7ae/1</a>                                                                                                                                                                                 |
| 19 | National Playing Fields Association                | 2004 | John, A. and Wheway R.                     | 45 pages  | the Disability Discrimination Act, value of play and recommendations for local playground                 | playspaces for disabled children                  |                 | minor concerns    | <a href="http://www.childrensplayadvisoryservice.org.uk/pdf_files/Publications/can_play_will_play-CPASwebsite.pdf">www.childrensplayadvisoryservice.org.uk/pdf_files/Publications/can_play_will_play-CPASwebsite.pdf</a>                                                                                        |
| 20 | NCB (National Children's Bureau)                   | 2009 | not described                              | 16 pages  | engagement of children and young people in the design process and practice examples                       | children and young people participation in design | Art 2<br>Art 12 | serious concerns  | No URL available                                                                                                                                                                                                                                                                                                |
| 21 | NSW (New South Wales) Government                   | 2019 | not described                              | 78 pages  | the inclusive play processes                                                                              | inclusive playspaces                              |                 | serious concerns  | <a href="https://www.planning.nsw.gov.au/-/media/Files/DPE/Guidelines/everyone-can-play-guideline-2019-02-20.pdf">https://www.planning.nsw.gov.au/-/media/Files/DPE/Guidelines/everyone-can-play-guideline-2019-02-20.pdf</a>                                                                                   |
| 22 | Office of Deputy Prime Minister                    | 2003 | Karen Dunn, Michele Moore and Pippa Murray | 40 pages  | understanding inclusive play design, engaging with disabled children and families and inclusion by design | accessible, inclusive playspaces                  | Art 31          | moderate concerns | <a href="https://www.thenbs.com/PublicationIndex/documents/details?Pub=ODPM&amp;DocID=265752">https://www.thenbs.com/PublicationIndex/documents/details?Pub=ODPM&amp;DocID=265752</a>                                                                                                                           |
| 23 | Play England, Department for Children, Schools and | 2008 | Aileen Shackell, Nicola Butler, Phil Doyle | 156 pages | design specification and management issues for play                                                       |                                                   | Art 31          | serious concerns  | <a href="https://www.playengland.org.uk/designforplay#:~:text=A%20guide%20to%20creating%20successful,experience%20risk%2C%20challenge%20and%20excitement.">https://www.playengland.org.uk/designforplay#:~:text=A%20guide%20to%20creating%20successful,experience%20risk%2C%20challenge%20and%20excitement.</a> |

|    |                                                               |      |                           |              |                                                                                                                                                                  |                                                                |                     |                                                                                                                                                                                                                                                            |
|----|---------------------------------------------------------------|------|---------------------------|--------------|------------------------------------------------------------------------------------------------------------------------------------------------------------------|----------------------------------------------------------------|---------------------|------------------------------------------------------------------------------------------------------------------------------------------------------------------------------------------------------------------------------------------------------------|
|    | Families,<br>Department<br>for Culture,<br>Media and<br>Sport |      | and<br>David<br>Ball      |              |                                                                                                                                                                  |                                                                |                     |                                                                                                                                                                                                                                                            |
| 24 | Play Wales                                                    | 2012 | not<br>described          | 6<br>pages   | local community<br>groups, creating<br>playable spaces,<br>changing minds and<br>changing spaces, repair<br>and maintenance                                      |                                                                | serious<br>concerns | <a href="http://www.playwales.org.uk/login/uploaded/documents/INFORMATION%20SHEETS/play%20spaces%20-%20planning%20and%20design.pdf">www.playwales.org.uk/login/uploaded/documents/INFORMATION%20SHEETS/play%20spaces%20-%20planning%20and%20design.pdf</a> |
| 25 | Play Wales                                                    | 2016 | not<br>described          | 37<br>pages  | design and<br>management of play<br>spaces                                                                                                                       | Art 12<br>Art 15<br>Art 31                                     | serious<br>concerns | <a href="https://issuu.com/playwales/docs/community_toolkit_2016">https://issuu.com/playwales/docs/community_toolkit_2016</a>                                                                                                                              |
| 26 | Play Wales                                                    | 2021 | not<br>described          | 60<br>pages  | design including<br>participation, design,<br>risk management and<br>management with<br>the mechanics of<br>managing an existing<br>or newly built play<br>space | Art 12<br>Art 15<br>Art 31<br>GC 17                            | serious<br>concerns | <a href="https://www.playwales.org.uk/eng/publications/communitytoolkit">https://www.playwales.org.uk/eng/publications/communitytoolkit</a>                                                                                                                |
| 27 | Playcore                                                      | 2012 | not<br>described          | 16<br>pages  | creating a vision,<br>identifying goals,<br>engaging the<br>community and<br>ensuring play value                                                                 |                                                                | serious<br>concerns | <a href="https://www.playandpark.com/uploads/wysiwyg/Blueprint-for-Play-Design-It.pdf">https://www.playandpark.com/uploads/wysiwyg/Blueprint-for-Play-Design-It.pdf</a>                                                                                    |
| 28 | Playground<br>Ideas                                           | n.d. | Marcus<br>Veerman         | 51<br>pages  | Listen, plan, design,<br>build and play                                                                                                                          | Art 31                                                         | serious<br>concerns | <a href="https://www.playgroundideas.org/wp-content/uploads/5-step-Manual-.pdf">https://www.playgroundideas.org/wp-content/uploads/5-step-Manual-.pdf</a>                                                                                                  |
| 29 | Playright                                                     | 2016 | Chris<br>H.C.<br>Yuen and | 132<br>pages | relevance of inclusive<br>play, design principles<br>for inclusive play<br>spaces, good practice,                                                                | inclusive<br>playspaces<br>Art 2<br>Art 23<br>Art 30<br>Art 31 | minor<br>concerns   | <a href="https://www.playright.org.hk/wp-content/uploads/2018/12/Playright-Inclusive-Play-Space-Guide.pdf">https://www.playright.org.hk/wp-content/uploads/2018/12/Playright-Inclusive-Play-Space-Guide.pdf</a>                                            |

|    |                        |      |               |          |                                                                                                                    |                       |        |                  |                                                                                                                                                                                                                                                                   |
|----|------------------------|------|---------------|----------|--------------------------------------------------------------------------------------------------------------------|-----------------------|--------|------------------|-------------------------------------------------------------------------------------------------------------------------------------------------------------------------------------------------------------------------------------------------------------------|
|    |                        |      | Theresa Casey |          | universal design and indicators for inclusive playspaces                                                           |                       |        |                  |                                                                                                                                                                                                                                                                   |
| 30 | Playworld              | 2015 | not described | 72 pages | playground standards, planning and preparation, play richness and selecting playground equipment.                  | inclusive playspaces  |        | serious concerns | no URL available                                                                                                                                                                                                                                                  |
| 31 | Playworld Systems      | 2015 | not described | 13 pages | building a committee, locating a site and consulting a playground specialist and selection of playground equipment |                       |        | serious concerns | <a href="https://playworld.com/psi_files/web/download/Playground_101_Guide.pdf">https://playworld.com/psi_files/web/download/Playground_101_Guide.pdf</a>                                                                                                         |
| 32 | Playworld Systems      | 2019 | not described | 45 pages | playground standards, planning and preparation of a playspace, play richness and selecting equipment.              | inclusive playspaces  | Art 31 | serious concerns | <a href="https://response.playworld.com/inclusivedesignguide">https://response.playworld.com/inclusive designguide</a>                                                                                                                                            |
| 33 | Real Play Coalition    | 2020 | not described | 36 pages | the power of play and current issues, the urban framework and activating play.                                     | playspaces in cities  | Art 31 | serious concerns | <a href="https://www.arup.com/perspectives/publications/research/section/reclaiming-play-in-cities">https://www.arup.com/perspectives/publications/research/section/reclaiming-play-in-cities</a>                                                                 |
| 34 | Rick Hansen Foundation | n.d. | not described | 96 pages | creating an inclusive play space, best practices and common problems                                               | inclusive playspaces  |        | serious concerns | <a href="https://www.rickhansen.com/sites/default/files/downloads/letsplaytoolkit.pdf">https://www.rickhansen.com/sites/default/files/downloads/letsplaytoolkit.pdf</a>                                                                                           |
| 35 | Rick Hansen Foundation | 2020 | not described | 40 pages | accessible play spaces, designing and building accessible play spaces, best practices and common issues,           | accessible playspaces |        | serious concerns | <a href="https://www.rickhansen.com/sites/default/files/downloads/sch-35913-guide-creating-accessible-play-spaceswebaccessible.pdf">https://www.rickhansen.com/sites/default/files/downloads/sch-35913-guide-creating-accessible-play-spaceswebaccessible.pdf</a> |

|    |                                                   |      |                                   |           |                                                                                                                                    |                      |        |                  |                                                                                                                                                                                                                                                                                                         |
|----|---------------------------------------------------|------|-----------------------------------|-----------|------------------------------------------------------------------------------------------------------------------------------------|----------------------|--------|------------------|---------------------------------------------------------------------------------------------------------------------------------------------------------------------------------------------------------------------------------------------------------------------------------------------------------|
| 36 | State of Victoria, Dept for Victorian Communities | 2007 | not described                     | 80 pages  | benefits of play, planning and providing accessible playspaces and design ideas                                                    |                      | Art 12 | serious concerns | <a href="https://www.playaustralia.org.au/sites/default/files/LibraryDownloads/The%20Good%20Play%20Space%20Guide%20I%20Can%20Play%20Too.pdf">https://www.playaustralia.org.au/sites/default/files/LibraryDownloads/The%20Good%20Play%20Space%20Guide%20I%20Can%20Play%20Too.pdf</a>                     |
| 37 | Touched by Olivia                                 | n.d. | not described                     | 7 pages   | everyone can play, connection to community, access to nature, play independence, friendship and social participation               | inclusive playspaces |        | serious concerns | <a href="http://www.touchedbyolivia.com.au/wp-content/uploads/The-6-Principles-for-Inclusive-Play.pdf">www.touchedbyolivia.com.au/wp-content/uploads/The-6-Principles-for-Inclusive-Play.pdf</a>                                                                                                        |
| 38 | Tualatin Hills Park & Recreation District         | 2012 | S. Jo Linden and Bruce Barbarasch | 24 pages  | nature play and free play natural playscapes                                                                                       | nature play areas    |        | serious concerns | <a href="http://www.touchedbyolivia.com.au/wp-content/uploads/The-6-Principles-for-Inclusive-Play.pdf">www.touchedbyolivia.com.au/wp-content/uploads/The-6-Principles-for-Inclusive-Play.pdf</a>                                                                                                        |
| 39 | Unknown                                           | 2014 | not described                     | 113 pages | recreational trails and beach access routes and outdoor play spaces                                                                |                      |        | serious concerns | <a href="https://www.cambridge.ca/en/learn-about/resources/DOPS-Guidelines.pdf">https://www.cambridge.ca/en/learn-about/resources/DOPS-Guidelines.pdf</a>                                                                                                                                               |
| 40 | Waverley Council                                  | 2021 | not described                     | 81 pages  | inclusive play context, strategic planning framework, Waverley context, community consultation and inclusive play space principles | inclusive playspace  | Art 31 | minor concerns   | <a href="https://haveyoursay.waverley.nsw.gov.au/inclusive-play-space-study">https://haveyoursay.waverley.nsw.gov.au/inclusive-play-space-study</a>                                                                                                                                                     |
| 41 | Wexford County Council Community                  | 2018 | not described                     | 37 pages  | team building, site identification, design and plan, organizing funds and installation                                             |                      |        | serious concerns | <a href="https://www.wexfordcoco.ie/sites/default/files/content/Community/Developing-a-Play-Area-in-your-Community-A-Step-by-Step-Guide-2018.-V.3.pdf">https://www.wexfordcoco.ie/sites/default/files/content/Community/Developing-a-Play-Area-in-your-Community-A-Step-by-Step-Guide-2018.-V.3.pdf</a> |

|    |                                    |      |                  |             |                                                                    |        |                     |                                                                                                                                                                                                                                                                                                                                                                                                                                                   |
|----|------------------------------------|------|------------------|-------------|--------------------------------------------------------------------|--------|---------------------|---------------------------------------------------------------------------------------------------------------------------------------------------------------------------------------------------------------------------------------------------------------------------------------------------------------------------------------------------------------------------------------------------------------------------------------------------|
|    | y<br>Developme<br>nt<br>Department |      |                  |             | and management of a<br>play area.                                  |        |                     |                                                                                                                                                                                                                                                                                                                                                                                                                                                   |
| 42 | Wokingha<br>m Borough<br>Council   | 2018 | not<br>described | 62<br>pages | play space standards,<br>design principles and<br>inclusive design | Art 31 | serious<br>concerns | <a href="https://www.wokingham.gov.uk/council-and-meetings/open-data/plans-policies-and-strategies/?assetdet91f252ff-550d-4cfa-a838-92ef2cb5f83c=462172&amp;categoryesctl91f252ff-550d-4cfa-a838-92ef2cb5f83c=2560&amp;p=4">https://www.wokingham.gov.uk/council-and-meetings/open-data/plans-policies-and-strategies/?assetdet91f252ff-550d-4cfa-a838-92ef2cb5f83c=462172&amp;categoryesctl91f252ff-550d-4cfa-a838-92ef2cb5f83c=2560&amp;p=4</a> |

Legenda: UN Convention on the Rights of the Child:

Art 2 (non-discrimination)

Art 12 (sharing their views and given due weight)

Art 15 (assembling, to set up groups)

Art 23 (rights of children with disabilities)

Art 30 (children of minorities and indigenous groups)

Art 31 (**rest, leisure, play, recreational activities, cultural life and the arts**)

GC 17 (general comment for further understanding of Arti

**Supplement File S3: Strategies for community involvement and children's participation represented in guidelines for designing public playspaces.**

[x] refers to corresponding guideline, see table 1.

| Theme                                                                                      | Strategies <sup>1</sup> for community involvement                                                                                                                                                                                                                                                             | Considerations, actions and plans for operationalizing the strategies for community involvement                                                                                                                                                                                                                                                                                                                                                                                                                                                                                                                                                                                                                                                                                                                                                                                                                                                                          |
|--------------------------------------------------------------------------------------------|---------------------------------------------------------------------------------------------------------------------------------------------------------------------------------------------------------------------------------------------------------------------------------------------------------------|--------------------------------------------------------------------------------------------------------------------------------------------------------------------------------------------------------------------------------------------------------------------------------------------------------------------------------------------------------------------------------------------------------------------------------------------------------------------------------------------------------------------------------------------------------------------------------------------------------------------------------------------------------------------------------------------------------------------------------------------------------------------------------------------------------------------------------------------------------------------------------------------------------------------------------------------------------------------------|
| <p>Giving space and time for consulting with the local community.</p> <p>34 references</p> | <p>Consulting with community members [9,16,27,21,23,35,39,42].</p> <p>Consultation with the impacted community members (including businesses) and/or with the public.</p> <p>Consider involvement of elected officials.</p>                                                                                   | <p>Communicate that a playspace should be seen as a space for the whole community.</p> <p>Engage with user groups.</p> <p>Engage with local children.</p> <p>Engage with interested professionals.</p> <p>Engage with members of local organizations: youth groups, church groups, schools and day-care centers, art groups, neighborhood organizations, vendors and business leaders, gardening club, public health, etc.</p> <p>Engage with children with disabilities together with their informal or formal caregivers.</p> <p>Engage with maintenance staff.</p> <p>Use intermediaries when to access groups you are finding hard to reach,</p> <p>Inform or involve elected council members of the area.</p> <p>Consider who is missing in this consultation loop.</p> <p>Engage with play equipment manufactures later in the process when a draft of the design has been discussed.</p> <p>Consultation needs to be scaled with the size of the development.</p> |
|                                                                                            | <p>Consulting with users, local children, and young people [1,6,9,21,27,39,42].</p>                                                                                                                                                                                                                           |                                                                                                                                                                                                                                                                                                                                                                                                                                                                                                                                                                                                                                                                                                                                                                                                                                                                                                                                                                          |
|                                                                                            | <p>The users can be children and young people of the neighborhood as well as from a wider distance. Children and young people can be approached through community-based children and youth groups or schools. Adult facilitators of youth groups and teachers might be enabling or hindering gatekeepers.</p> |                                                                                                                                                                                                                                                                                                                                                                                                                                                                                                                                                                                                                                                                                                                                                                                                                                                                                                                                                                          |
|                                                                                            | <p>Consulting with children with disabilities and their caregivers [15,22,26, 27,37,39].</p> <p>All children's voice should be considered and to create an inclusive playspace.</p> <p>Children with disabilities and their caregivers can give valuable insights.</p>                                        |                                                                                                                                                                                                                                                                                                                                                                                                                                                                                                                                                                                                                                                                                                                                                                                                                                                                                                                                                                          |
|                                                                                            | <p>Consulting with professionals [15,16,21,22,35].</p>                                                                                                                                                                                                                                                        |                                                                                                                                                                                                                                                                                                                                                                                                                                                                                                                                                                                                                                                                                                                                                                                                                                                                                                                                                                          |

<sup>1</sup> The word strategy is used in the meaning of "a way of doing something or dealing with something" (*Cambridge Dictionary*, n.d.)

|                                                                                                                                         |                                                                                                                                                                                                   |                                                                                                                                                                                                                                                                                                                                                                                                                                                                                                                                                                                                                                                                                                                                                                              |
|-----------------------------------------------------------------------------------------------------------------------------------------|---------------------------------------------------------------------------------------------------------------------------------------------------------------------------------------------------|------------------------------------------------------------------------------------------------------------------------------------------------------------------------------------------------------------------------------------------------------------------------------------------------------------------------------------------------------------------------------------------------------------------------------------------------------------------------------------------------------------------------------------------------------------------------------------------------------------------------------------------------------------------------------------------------------------------------------------------------------------------------------|
|                                                                                                                                         | Think about officers/technicians from planning, design and maintenance as well as children's experts such as facilitators of youth groups, teachers and parents.                                  | <p>Community involvement starts at an early stage.<br/>Reconnect with key groups periodically.<br/>Involve the community in the planning, design, construction, maintenance and progressive enhancement phase.</p> <p>All meetings but for sure the initial meeting should be interactive.</p> <p>Communicate with officials and elected officers, all the people who take part in the community involvement, funders and local/national media.<br/>Give feedback about the process and what has been done with their shared information on a regular base.</p>                                                                                                                                                                                                              |
|                                                                                                                                         | Engaging early from the start [17,18].                                                                                                                                                            |                                                                                                                                                                                                                                                                                                                                                                                                                                                                                                                                                                                                                                                                                                                                                                              |
|                                                                                                                                         | Aligning with like-minded community members at the start.<br>Connect with all stakeholders early.                                                                                                 |                                                                                                                                                                                                                                                                                                                                                                                                                                                                                                                                                                                                                                                                                                                                                                              |
|                                                                                                                                         | Consulting regularly throughout the process [6,11,17,22,28].<br><br>Go back to the community regularly, certainly at key stages such as planning, design, construction and maintenance.           |                                                                                                                                                                                                                                                                                                                                                                                                                                                                                                                                                                                                                                                                                                                                                                              |
| <p>Identifying the needs of the community, beyond play, through an active, meaningful, and empowered approach.</p> <p>43 references</p> | Giving information about the project and processes [1,17,27,37].                                                                                                                                  | <p>Use an Assets Based Community Development approach instead of agenda of fixing problems.</p> <p>Align yourself with like-minded community members.</p> <p>Key is to get an insider perspective.</p> <p>The steering group gives information about the project to the involved key stakeholders.<br/>The steering group shares themes and ideas and asks for feedback.</p> <p>Engage with the local community in a realistic and meaningful way:</p> <ul style="list-style-type: none"> <li>- Use different sources: files and records, public hearings, surveys, children's classroom projects, staff, recommendations and professional consultants.</li> <li>- Use collaborative approach.</li> <li>- Be transparent.</li> <li>- Be active and fully engaged.</li> </ul> |
|                                                                                                                                         | Giving information about the planning and design process.<br>Giving information about the community engagement strategy.                                                                          |                                                                                                                                                                                                                                                                                                                                                                                                                                                                                                                                                                                                                                                                                                                                                                              |
|                                                                                                                                         | Providing site visits with informal engagements and discussions [11,14,23,27,28].                                                                                                                 |                                                                                                                                                                                                                                                                                                                                                                                                                                                                                                                                                                                                                                                                                                                                                                              |
|                                                                                                                                         | Identify needs of community, e.g., how place is used in existing conditions, level of services, access, benchmark to neighborhood, potential resources, needs and wishes of users and caregivers. |                                                                                                                                                                                                                                                                                                                                                                                                                                                                                                                                                                                                                                                                                                                                                                              |
|                                                                                                                                         | Connecting with users and community members through intermediaries, local forums, and families [16,22,27].                                                                                        |                                                                                                                                                                                                                                                                                                                                                                                                                                                                                                                                                                                                                                                                                                                                                                              |
|                                                                                                                                         | Local groups, professionals, volunteering groups and families can facilitate participation of children and young people.<br>Participation can be electronically facilitated.                      |                                                                                                                                                                                                                                                                                                                                                                                                                                                                                                                                                                                                                                                                                                                                                                              |
|                                                                                                                                         | Applying an actively and strength-based approach with community members and children and young people [2,3,4,5,6,7,10,13,14,21,22,27,28,37].                                                      |                                                                                                                                                                                                                                                                                                                                                                                                                                                                                                                                                                                                                                                                                                                                                                              |

|  |                                                                                                                                                                                                                                                                                                                                                                                                                                                                                                                                                                  |                                                                                                                                                                                                                                                                                                                                                                                                                                                                                                                                                                                                                                                                                                                                                                                                                                                                                                                                                                                                                                                                                                                                                                                                                                                                                                                                                                                                                                                                                                                                                        |
|--|------------------------------------------------------------------------------------------------------------------------------------------------------------------------------------------------------------------------------------------------------------------------------------------------------------------------------------------------------------------------------------------------------------------------------------------------------------------------------------------------------------------------------------------------------------------|--------------------------------------------------------------------------------------------------------------------------------------------------------------------------------------------------------------------------------------------------------------------------------------------------------------------------------------------------------------------------------------------------------------------------------------------------------------------------------------------------------------------------------------------------------------------------------------------------------------------------------------------------------------------------------------------------------------------------------------------------------------------------------------------------------------------------------------------------------------------------------------------------------------------------------------------------------------------------------------------------------------------------------------------------------------------------------------------------------------------------------------------------------------------------------------------------------------------------------------------------------------------------------------------------------------------------------------------------------------------------------------------------------------------------------------------------------------------------------------------------------------------------------------------------------|
|  | <p>Consultation has to be realistic and meaningful.<br/>It can draw on different formal and informal engagement sources e.g., public hearings, classroom/group activities, surveys, observations and the advisory board.</p> <p>Participation needs a facilitator who can connect, communicate and positively interact with children and community.<br/>Talk about what they are already doing at the space and about their wants and needs.</p> <p>The process needs to be transparent and requires regularly update to reflect the changes in the project.</p> | <ul style="list-style-type: none"> <li>- Ask what community members want.</li> <li>- Go out and ask what they are already doing.</li> <li>- Listen to how the community already support their children.</li> <li>- Identify spaces that will best serve their play priorities.</li> <li>- Identify underutilized spaces.</li> <li>- Organize informal engagement at the play space.</li> <li>- Observe children and other people at the playspace at different times: how long do they spent time at the place, how is equipment used, what do people of different ages do.</li> <li>- Identify wants and needs of different stakeholders.</li> <li>- Set up design sessions, in any format, providing the listening, learning and imagining that makes your playspace come to life.</li> <li>- Give considerations to the information shared by stakeholders.</li> <li>- Be constantly prepared to revise attempts to engage with children and the community.</li> <li>- Inform the stakeholders about the decisions to be made.</li> </ul> <p>Be aware of changing needs of the community so set up a sustainable review process.</p> <p>Children and young people should be asked every year how satisfied they are with the playspace.</p> <p>Questions for community members</p> <ul style="list-style-type: none"> <li>- Which experiences have you enjoyed when you were a child?</li> <li>- What experiences do you see children enjoying now?</li> <li>- What kind of experiences would you like to see children to be exposed to?</li> </ul> |
|--|------------------------------------------------------------------------------------------------------------------------------------------------------------------------------------------------------------------------------------------------------------------------------------------------------------------------------------------------------------------------------------------------------------------------------------------------------------------------------------------------------------------------------------------------------------------|--------------------------------------------------------------------------------------------------------------------------------------------------------------------------------------------------------------------------------------------------------------------------------------------------------------------------------------------------------------------------------------------------------------------------------------------------------------------------------------------------------------------------------------------------------------------------------------------------------------------------------------------------------------------------------------------------------------------------------------------------------------------------------------------------------------------------------------------------------------------------------------------------------------------------------------------------------------------------------------------------------------------------------------------------------------------------------------------------------------------------------------------------------------------------------------------------------------------------------------------------------------------------------------------------------------------------------------------------------------------------------------------------------------------------------------------------------------------------------------------------------------------------------------------------------|

|                                                                                           |                                                                                                                                                                                                                                                                                                                                                                                                                                                                                                                                                                                                                                                                                                                                                                                                                                                                                                                                                                                                                                                                                                                                                                                                                                                                                                                                                                               |                                                                                                                                                                                                                                                                                                                                                                                                                                                                                                                                                                                                                                                                                                                                                                                                                                                                                                                                                                                                                                                                                                                                                                                                                                                                                                                    |
|-------------------------------------------------------------------------------------------|-------------------------------------------------------------------------------------------------------------------------------------------------------------------------------------------------------------------------------------------------------------------------------------------------------------------------------------------------------------------------------------------------------------------------------------------------------------------------------------------------------------------------------------------------------------------------------------------------------------------------------------------------------------------------------------------------------------------------------------------------------------------------------------------------------------------------------------------------------------------------------------------------------------------------------------------------------------------------------------------------------------------------------------------------------------------------------------------------------------------------------------------------------------------------------------------------------------------------------------------------------------------------------------------------------------------------------------------------------------------------------|--------------------------------------------------------------------------------------------------------------------------------------------------------------------------------------------------------------------------------------------------------------------------------------------------------------------------------------------------------------------------------------------------------------------------------------------------------------------------------------------------------------------------------------------------------------------------------------------------------------------------------------------------------------------------------------------------------------------------------------------------------------------------------------------------------------------------------------------------------------------------------------------------------------------------------------------------------------------------------------------------------------------------------------------------------------------------------------------------------------------------------------------------------------------------------------------------------------------------------------------------------------------------------------------------------------------|
| <p>Establishing a shared vision responsive to community's needs.</p> <p>64 references</p> | <p>Acknowledging children's expertise [1,4,11,13,16,20,21,22,25,27,33,39].</p> <p>Children are the users and experts of a playspace.<br/>Children's view and adult's view on what they want can differ.<br/>The combined expertise of children and adults will yield better decisions.<br/>To give children entitlement as community member.<br/>To provide a genuinely children influenced playspace.<br/>To value inclusive consultation.<br/>To facilitate children's sense of empowerment and agency.<br/>To raise children's self-confidence as community member.<br/>To give children opportunities for learning about democracy and tolerance, for acquiring skills and knowledge about decision-making processes.</p> <p>Aiming for community's ownership and reduction of risks of vandalism [1,4,6,7,9,11,13,16,20,22,23,24,27,28,31,36,37].</p> <p>To get a better used playspaces.<br/>To get more informed decisions and improved designs.<br/>To optimize effectiveness and utilization of the playspace and neighborhood.<br/>More likely that the community uses playspace and provide public surveillance.<br/>To achieve that the community (children and adults) takes ownership over the place.<br/>To reduce risks of vandalism.<br/>To create greater tolerance to outdoor play.<br/>It will enhance a strategic approach to play at a local level.</p> | <p>Children are experts of their own live and know what they want. Children are not only the users of the playspace but also the creators.</p> <p>What adults wants in a playspace may not be the same as what children want.<br/>Some adults may have forgotten what it is like to be a child.</p> <p>Community involvement provides the wider community an exposure to the project.<br/>It brings an understanding of the lived experiences of the community residents.<br/>Outcomes of the project will be more meaningful when a variety of stakeholders are involved.</p> <p>To provide a genuine children influenced playspace.<br/>To facilitate children's sense of empowerment and agency in their local community.<br/>To ensure that outcomes are responsive to community needs and aspirations in current and future provision.<br/>To provide valuable insights about diverse needs of children and caregivers.<br/>To produce better council's services.<br/>To get a better used playspace.<br/>To provide public surveillance<br/>To have a sense of ownership over the site.<br/>To enhance the strategic approach at a local level through local play partnership.<br/>To raise self-confidence of individuals and groups.<br/>To affirm entitlement as community members and organizations.</p> |
|-------------------------------------------------------------------------------------------|-------------------------------------------------------------------------------------------------------------------------------------------------------------------------------------------------------------------------------------------------------------------------------------------------------------------------------------------------------------------------------------------------------------------------------------------------------------------------------------------------------------------------------------------------------------------------------------------------------------------------------------------------------------------------------------------------------------------------------------------------------------------------------------------------------------------------------------------------------------------------------------------------------------------------------------------------------------------------------------------------------------------------------------------------------------------------------------------------------------------------------------------------------------------------------------------------------------------------------------------------------------------------------------------------------------------------------------------------------------------------------|--------------------------------------------------------------------------------------------------------------------------------------------------------------------------------------------------------------------------------------------------------------------------------------------------------------------------------------------------------------------------------------------------------------------------------------------------------------------------------------------------------------------------------------------------------------------------------------------------------------------------------------------------------------------------------------------------------------------------------------------------------------------------------------------------------------------------------------------------------------------------------------------------------------------------------------------------------------------------------------------------------------------------------------------------------------------------------------------------------------------------------------------------------------------------------------------------------------------------------------------------------------------------------------------------------------------|

|                                                                                                                              |                                                                                                                                                                                                                                                                                                                                                                                                                                                                                                                                                                                                               |                                                                                                                                                                                                                                                                                                                                                                                                                                                                                                                                                                                         |
|------------------------------------------------------------------------------------------------------------------------------|---------------------------------------------------------------------------------------------------------------------------------------------------------------------------------------------------------------------------------------------------------------------------------------------------------------------------------------------------------------------------------------------------------------------------------------------------------------------------------------------------------------------------------------------------------------------------------------------------------------|-----------------------------------------------------------------------------------------------------------------------------------------------------------------------------------------------------------------------------------------------------------------------------------------------------------------------------------------------------------------------------------------------------------------------------------------------------------------------------------------------------------------------------------------------------------------------------------------|
|                                                                                                                              | <p>Achieving outcomes responsive to community's needs and aspirations. [2,4,6,8,11,20,27,29,33,36,40].</p> <p>Meeting the needs of the community.<br/>Consulting effectively with users produces better services.<br/>Outcome is assured to be more meaningful.<br/>Understanding what kind of activities children, young people and the community enjoy in their free time.<br/>Funding is spent as good practice.<br/>Getting liveable, enjoyable and sustainable environments for everyone.<br/>Forming relationships between municipality and the community that can be beneficial to other projects.</p> | <p>Integrate playspaces into the framework of the existing neighborhood to optimize effectiveness and utilization.</p> <p>Explore what is already known in the community about the space and about children's play.</p> <p>Assure that the local community recognize priorities and expectations in the proposed design.</p> <p>Community involvement and children's participation is often a condition of funding.</p>                                                                                                                                                                 |
| <b>Theme</b>                                                                                                                 | <b>Strategies<sup>2</sup> for children's participation</b>                                                                                                                                                                                                                                                                                                                                                                                                                                                                                                                                                    | <b>Considerations, actions and plans for operationalizing the strategies for children's participation</b>                                                                                                                                                                                                                                                                                                                                                                                                                                                                               |
| <p>Giving children safe, inclusive opportunities to form and express their views about playspaces.</p> <p>101 references</p> | Early involvement of children [1,6,11,16,26, 29,35,39,41].<br>10 references                                                                                                                                                                                                                                                                                                                                                                                                                                                                                                                                   | <p>Start early meetings and conversations as it can ultimately lead to a more cost-effective project.</p> <p>Don't reach for the equipment catalogues but think creatively and broadly about the kinds of experience you hope the space will offer.</p> <p>Early involvement of children can generate excitement.</p> <p>Early participation in concept, design and implementation stages will result in increased ownership.</p> <p>Create sustainable involvement through validation against other children in same age group, with the general community and with professionals.</p> |
|                                                                                                                              | Creating sustainable involvement [1,6,11,12,20,21,22,26,27,29,30,36].<br>25 references                                                                                                                                                                                                                                                                                                                                                                                                                                                                                                                        |                                                                                                                                                                                                                                                                                                                                                                                                                                                                                                                                                                                         |
|                                                                                                                              | Ensuring an inclusive and accessible process [1,6,16, 19].<br>5 references                                                                                                                                                                                                                                                                                                                                                                                                                                                                                                                                    |                                                                                                                                                                                                                                                                                                                                                                                                                                                                                                                                                                                         |
|                                                                                                                              | Involving those children who are affected [1,6,7,9,11,12,16,18,19,20,22,26,27,28,29,30,31,32,34,35,36,38,39,40,41].<br>63 references                                                                                                                                                                                                                                                                                                                                                                                                                                                                          |                                                                                                                                                                                                                                                                                                                                                                                                                                                                                                                                                                                         |
|                                                                                                                              | Supporting children to feel safe and comfortable expressing themselves [1,6,27].<br>3 references                                                                                                                                                                                                                                                                                                                                                                                                                                                                                                              |                                                                                                                                                                                                                                                                                                                                                                                                                                                                                                                                                                                         |
|                                                                                                                              | Being able to provide support for when children become upset.<br>0 references                                                                                                                                                                                                                                                                                                                                                                                                                                                                                                                                 |                                                                                                                                                                                                                                                                                                                                                                                                                                                                                                                                                                                         |

<sup>2</sup> The word strategy is used in the meaning of "a way of doing something or dealing with something" (Cambridge Dictionary, n.d.)

|  |  |                                                                                                                                                                                                                                                                                                                                                                                                                                                                                                                                                                                                                                                                                                                                                                                                                                                                                                                                                                                                                                                                                                                                                                                                                                                                                                                              |
|--|--|------------------------------------------------------------------------------------------------------------------------------------------------------------------------------------------------------------------------------------------------------------------------------------------------------------------------------------------------------------------------------------------------------------------------------------------------------------------------------------------------------------------------------------------------------------------------------------------------------------------------------------------------------------------------------------------------------------------------------------------------------------------------------------------------------------------------------------------------------------------------------------------------------------------------------------------------------------------------------------------------------------------------------------------------------------------------------------------------------------------------------------------------------------------------------------------------------------------------------------------------------------------------------------------------------------------------------|
|  |  | <p>Arrange different meetings, e.g., town hall, on-site, design and constructing together meetings, which will facilitate sustainable involvement of children.</p> <p>An ongoing consultation helps to understand changing priorities, cultural considerations and expectations and helps to establish relationships.</p> <p>The best consultation processes are two-way processes that involve ongoing dialogue and mutual learning.</p> <p>The participation meetings have an experiential learning component and a reflection and discussion component and invite each child in a dialogue.</p> <p>Participation processes should involve children and young people, teachers, parents/caregivers and the local community.</p> <p>The preferred approach is via knowledgeable facilitators who are open and can engage in dialogues.</p> <p>The facilitator should share the purpose of the workshop and explain the ground rules for participation.</p> <p>Stations for consultation should be set up in strategic locations.</p> <p>Children can be involved in</p> <ul style="list-style-type: none"> <li>- Basic inspections and reporting;</li> <li>- Developing a survey;</li> <li>- Expressing what they want and need;</li> <li>- Sharing information about what they like and dislike about the site;</li> </ul> |
|--|--|------------------------------------------------------------------------------------------------------------------------------------------------------------------------------------------------------------------------------------------------------------------------------------------------------------------------------------------------------------------------------------------------------------------------------------------------------------------------------------------------------------------------------------------------------------------------------------------------------------------------------------------------------------------------------------------------------------------------------------------------------------------------------------------------------------------------------------------------------------------------------------------------------------------------------------------------------------------------------------------------------------------------------------------------------------------------------------------------------------------------------------------------------------------------------------------------------------------------------------------------------------------------------------------------------------------------------|

|                                               |                                                                                                                                                                                                                                                                                                                                                                                                                                                                                                                                                                                                                                                                                                        |                                                                                                                                                                                                                                                                                                                                                                                                                                                                                                                                                                                                                                                                                                                                                                                                                         |
|-----------------------------------------------|--------------------------------------------------------------------------------------------------------------------------------------------------------------------------------------------------------------------------------------------------------------------------------------------------------------------------------------------------------------------------------------------------------------------------------------------------------------------------------------------------------------------------------------------------------------------------------------------------------------------------------------------------------------------------------------------------------|-------------------------------------------------------------------------------------------------------------------------------------------------------------------------------------------------------------------------------------------------------------------------------------------------------------------------------------------------------------------------------------------------------------------------------------------------------------------------------------------------------------------------------------------------------------------------------------------------------------------------------------------------------------------------------------------------------------------------------------------------------------------------------------------------------------------------|
|                                               |                                                                                                                                                                                                                                                                                                                                                                                                                                                                                                                                                                                                                                                                                                        | <ul style="list-style-type: none"> <li>- Telling what may be missing in the current playspace;</li> <li>- Advising and informing the design brief.</li> </ul> <p>Make sure you talk directly to the children.</p> <p>Additionally, listen and observe children playing at existing playgrounds.</p> <p>Conduct targeted outreach to underrepresented members such as children with disabilities and their parents/caregivers.</p> <p>Consultation with any hard-to-reach group takes time which should be built in the process.</p> <p>Views should be collected of the children that make up the community, including variety in age, ability, gender, socio-economic status, race and culture.</p>                                                                                                                    |
| Facilitating children to express their views. | <p>Ensuring there is a list of topics on which you want to hear children's views [1,6,7,16,23,27,28,36,41].<br/>18 references</p> <p>Ensuring that the key focus of the process stays on the topic [20,41].<br/>2 references</p> <p>Informing children that participation is voluntary at any time<br/>0 references</p> <p>Supporting children in giving their own views [1,6,7,9,13,16,20,22,23,25,26,27,28,34,35,36,39,42].<br/>36 references</p> <p>Ensuring a range of ways for children to express themselves [1,4,11,16,20,22,25,26,27,28,29,31, 34,35,36,41].<br/>54 references</p> <p>Allowing children to identify topics to discuss to add to list of topics [1,20,27].<br/>3 references</p> | <p>Consultation and engagement activities require a plan:</p> <ul style="list-style-type: none"> <li>- What do you need to find out?</li> <li>- What are the hopes and aspirations for the play space?</li> <li>- What ideas do people have for the design?</li> <li>- What general character would people like the space to have?</li> <li>- What do children and young people want to be able to do/experience?</li> <li>- What do people need to make it more inclusive and accessible space?</li> </ul> <p>Different ways of collecting children's views</p> <ul style="list-style-type: none"> <li>- Drawing a picture of their playground;</li> <li>- Drawing a map of their community and identify places where they have played;</li> <li>- Model designs, e.g., with loose materials or plasticine;</li> </ul> |

|  |  |                                                                                                                                                                                                                                                                                                                                                                                                                                                                                                                                                                                                                                                                                                                                                                                                                                                                                                                                                                                                                                                                                                                                                                                                                                                                                                                                                                                                                                                                                     |
|--|--|-------------------------------------------------------------------------------------------------------------------------------------------------------------------------------------------------------------------------------------------------------------------------------------------------------------------------------------------------------------------------------------------------------------------------------------------------------------------------------------------------------------------------------------------------------------------------------------------------------------------------------------------------------------------------------------------------------------------------------------------------------------------------------------------------------------------------------------------------------------------------------------------------------------------------------------------------------------------------------------------------------------------------------------------------------------------------------------------------------------------------------------------------------------------------------------------------------------------------------------------------------------------------------------------------------------------------------------------------------------------------------------------------------------------------------------------------------------------------------------|
|  |  | <ul style="list-style-type: none"> <li>- Taking children to playgrounds outside their area;</li> <li>- Discussions in small groups;</li> <li>- Focus groups together with community members and recreation organizations;</li> <li>- Art and design activities;</li> <li>- Display plans and ask feedback;</li> <li>- Go out and talk to children wherever they are;</li> <li>- Drama and role-play;</li> <li>- Photography;</li> <li>- Video work;</li> <li>- Visual and/or sensory mapping;</li> <li>- Story telling;</li> <li>- One-to-one or peer interview;</li> <li>- Physical games;</li> <li>- Show images of inclusive playspace to elicit a discussion;</li> <li>- Questionnaire to seek feedback on a concept;</li> <li>- Organized activities to experience the environment, e.g., bush walks, constructing sand sculpture or making a mud brick;</li> <li>- Site visits or introduce temporary props and images;</li> <li>- Ask children to teach you a game;</li> <li>- Some resources developed children's participation purpose in designing a playspace, e.g., Pac-a-Map.</li> </ul> <p>Questions to ask children:</p> <ul style="list-style-type: none"> <li>- Where do you play?</li> <li>- What do you do when you play?</li> <li>- What do you like to play?</li> <li>- What kind of spaces do you like?</li> <li>- What features and activities are interesting you?</li> <li>- What do your siblings like?</li> <li>- What do you do as a family?</li> </ul> |
|--|--|-------------------------------------------------------------------------------------------------------------------------------------------------------------------------------------------------------------------------------------------------------------------------------------------------------------------------------------------------------------------------------------------------------------------------------------------------------------------------------------------------------------------------------------------------------------------------------------------------------------------------------------------------------------------------------------------------------------------------------------------------------------------------------------------------------------------------------------------------------------------------------------------------------------------------------------------------------------------------------------------------------------------------------------------------------------------------------------------------------------------------------------------------------------------------------------------------------------------------------------------------------------------------------------------------------------------------------------------------------------------------------------------------------------------------------------------------------------------------------------|

|  |  |                                                                                                                                                                                                                                                                                                                                                                                                                                                                                                                                                                                                                                                                                                                                                                                                                                                                                                                                                                                                                                                                                                                                                                                                                                                                                                                                                                                                                                                                                            |
|--|--|--------------------------------------------------------------------------------------------------------------------------------------------------------------------------------------------------------------------------------------------------------------------------------------------------------------------------------------------------------------------------------------------------------------------------------------------------------------------------------------------------------------------------------------------------------------------------------------------------------------------------------------------------------------------------------------------------------------------------------------------------------------------------------------------------------------------------------------------------------------------------------------------------------------------------------------------------------------------------------------------------------------------------------------------------------------------------------------------------------------------------------------------------------------------------------------------------------------------------------------------------------------------------------------------------------------------------------------------------------------------------------------------------------------------------------------------------------------------------------------------|
|  |  | <ul style="list-style-type: none"> <li>- Are there any particular themes you think would suit the character of the space?</li> <li>- What are joyful experiences?</li> <li>- What are the most dangerous, scary places you have ever gone?</li> <li>- Where would you like to alone?</li> <li>- Where do you like to be with friends?</li> <li>- What is the silliest thing you have ever done?</li> <li>- What games do you invent?</li> <li>- What activities would you like to try which you haven't tried before?</li> <li>- What have you missed?</li> </ul> <p>Better not ask children:</p> <ul style="list-style-type: none"> <li>- What playground equipment would you like?</li> </ul> <p>The facilitator should consider:</p> <ul style="list-style-type: none"> <li>- Adapting the techniques to the needs and aspirations of the different ages, preferences and background of the children.</li> <li>- Stretching children's imagination beyond their existing knowledge.</li> <li>- Give children extra support, e.g., model-making workshop.</li> <li>- Providing extra support and materials for children with special needs, e.g., for communication and for understanding.</li> <li>- Leading discussions surrounding play, community, favorite activities and considerations such as inclusion, nature, colors, surfacing and maintenance.</li> </ul> <p>A series of design considerations should be considered before narrowing it down to a list of key outcomes.</p> |
|--|--|--------------------------------------------------------------------------------------------------------------------------------------------------------------------------------------------------------------------------------------------------------------------------------------------------------------------------------------------------------------------------------------------------------------------------------------------------------------------------------------------------------------------------------------------------------------------------------------------------------------------------------------------------------------------------------------------------------------------------------------------------------------------------------------------------------------------------------------------------------------------------------------------------------------------------------------------------------------------------------------------------------------------------------------------------------------------------------------------------------------------------------------------------------------------------------------------------------------------------------------------------------------------------------------------------------------------------------------------------------------------------------------------------------------------------------------------------------------------------------------------|

|                                                                                                    |                                                                                                                                                                                      |                                                                                                                                                                                                                                                                                                                                                                                                                                                                                                                                                                                                                                                                                    |
|----------------------------------------------------------------------------------------------------|--------------------------------------------------------------------------------------------------------------------------------------------------------------------------------------|------------------------------------------------------------------------------------------------------------------------------------------------------------------------------------------------------------------------------------------------------------------------------------------------------------------------------------------------------------------------------------------------------------------------------------------------------------------------------------------------------------------------------------------------------------------------------------------------------------------------------------------------------------------------------------|
|                                                                                                    |                                                                                                                                                                                      | Children (and other stakeholders) can be asked to vote for the most valuable proposal.                                                                                                                                                                                                                                                                                                                                                                                                                                                                                                                                                                                             |
| <p>Informing children who will be listening to their views on playspaces.</p> <p>15 references</p> | <p>Informing children to whom, how and when views will be communicated, demonstrating commitment to be informed and influenced by their views [1,4,5,20,23].</p> <p>5 references</p> | <p>Be clear with children that they are not designers.</p> <p>Inform children that their ideas will inform the designer prior to the site design beginning.</p>                                                                                                                                                                                                                                                                                                                                                                                                                                                                                                                    |
|                                                                                                    | <p>Showing your commitment to be informed and influenced by their views [9,16,20,22,27,41].</p> <p>6 references</p>                                                                  | <p>Explain to the children that meaningful participation will require a commitment across the stages of the design process and will take time.</p>                                                                                                                                                                                                                                                                                                                                                                                                                                                                                                                                 |
|                                                                                                    | <p>Informing children about the identification of decision-makers.</p> <p>0 references</p>                                                                                           | <p>Tell the children that the participation process is intended to have the best outcomes for children and to create a child-friendly environment.</p>                                                                                                                                                                                                                                                                                                                                                                                                                                                                                                                             |
|                                                                                                    | <p>Reporting back to the children about the decision-making process in a child-friendly way [1].</p> <p>2 references</p>                                                             |                                                                                                                                                                                                                                                                                                                                                                                                                                                                                                                                                                                                                                                                                    |
|                                                                                                    | <p>Giving children the opportunity to confirm their views.</p> <p>0 reference</p>                                                                                                    | <p>Inform the children what you need help with and that the specific needs of user groups regarding play will inform all those involved in the design process.</p>                                                                                                                                                                                                                                                                                                                                                                                                                                                                                                                 |
|                                                                                                    | <p>Giving children a role in communicating their views [6,27].</p> <p>2 references</p>                                                                                               | <p>Explain to the children that their views but also site characteristics, local development plans, demographic data, historical information, local community consultation and outcomes of events will inform the design.</p> <p>Inform the children that all ideas will be valued as insights and documented, e.g., in a report, in a display, consultation book. These tools can be used for outreach, advertising and grand and fundraising appeals and to generate excitement.</p> <p>Clarify to the children that their views will be reported to the steering group and handed to the open space planners and landscape architects working on the playspace development.</p> |

|                                                                                                        |                                                                                                       |                                                                                                                                                                                                                                                                                                                                                                                                                                                                                                                                                                                                                                                                                                                                                                                                                                                                                                                                                                                                                                                                                                                                                                                                                                                        |
|--------------------------------------------------------------------------------------------------------|-------------------------------------------------------------------------------------------------------|--------------------------------------------------------------------------------------------------------------------------------------------------------------------------------------------------------------------------------------------------------------------------------------------------------------------------------------------------------------------------------------------------------------------------------------------------------------------------------------------------------------------------------------------------------------------------------------------------------------------------------------------------------------------------------------------------------------------------------------------------------------------------------------------------------------------------------------------------------------------------------------------------------------------------------------------------------------------------------------------------------------------------------------------------------------------------------------------------------------------------------------------------------------------------------------------------------------------------------------------------------|
| Informing children of actions taken as a result of their shared views<br><br><br><br><br>30 references | Informing children about the scope of influence [1,4,6,9,16,20,23,27,35,40,41].<br>12 references      | <p>Inform the children about the parameters of their involvement (e.g., reflecting planning principles, budget).<br/>Explain children that principles will always be adapted to suit each playspace and the local community's needs.</p> <p>Give a checklist to guide the process.</p> <p>Inform the children about the overall aim: all children and young people should be able to use the same playspace, enjoy different times of play, play with others and share experiences (and not that every play need is met).</p> <p>Tell the children how important their role in the participation process is.</p> <p>Explain the children that the time between different phases can take long time.</p> <p>Explain that the participation process has to be fair but will not avoid any disagreements.</p> <p>Inform children and their caregivers about the deadline for consultation.</p> <p>Describe to the children the role of the facilitator in relation to the decision-maker(s).</p> <p>Explain the children that all suggestions will be considered, but realizing all ideas is not feasible.</p> <p>Summarize children's ideas and all elements under consideration for the playspace design and explain how they relate to each other.</p> |
|                                                                                                        | Giving age-appropriate feedback during the design process [1,20].<br>2 references                     |                                                                                                                                                                                                                                                                                                                                                                                                                                                                                                                                                                                                                                                                                                                                                                                                                                                                                                                                                                                                                                                                                                                                                                                                                                                        |
|                                                                                                        | Planning to make sure that children's views impact on decisions [1,4,13,23,27,29,41].<br>9 references |                                                                                                                                                                                                                                                                                                                                                                                                                                                                                                                                                                                                                                                                                                                                                                                                                                                                                                                                                                                                                                                                                                                                                                                                                                                        |
|                                                                                                        | Giving children age-appropriated feedback on how their views were used [1,20].<br>5 references        |                                                                                                                                                                                                                                                                                                                                                                                                                                                                                                                                                                                                                                                                                                                                                                                                                                                                                                                                                                                                                                                                                                                                                                                                                                                        |
|                                                                                                        | Providing opportunities to evaluate the participation process [1,20].<br>2 references                 |                                                                                                                                                                                                                                                                                                                                                                                                                                                                                                                                                                                                                                                                                                                                                                                                                                                                                                                                                                                                                                                                                                                                                                                                                                                        |

|  |  |                                                                                                                                                                                                                                                                                                                                                                                                                                                                                                                                                                                                                                                                                                                                                                                                                                                                                                                                 |
|--|--|---------------------------------------------------------------------------------------------------------------------------------------------------------------------------------------------------------------------------------------------------------------------------------------------------------------------------------------------------------------------------------------------------------------------------------------------------------------------------------------------------------------------------------------------------------------------------------------------------------------------------------------------------------------------------------------------------------------------------------------------------------------------------------------------------------------------------------------------------------------------------------------------------------------------------------|
|  |  | <p>Let the landscape architect or designer present the concept design to the children in a child friendly way, free of jargon, with acknowledgement of their input. Children should be given an opportunity to question the designers and the decisions that had been made.</p> <p>The council shows support to the design process in ensuring effective outcomes for the children involved and the space emerging.</p> <p>Let children help the contractor to construct the site, e.g., tree planting.</p> <p>Celebrating the opening of a playspace with the children offering a public opportunity to recognize the contribution of involved children.</p> <p>Inform the children about maintenance activities.</p> <p>Give children the possibility to give feedback on the participation process.</p> <p>Let the children share their experiences in using the playspace, as a start of a process of continual review.</p> |
|--|--|---------------------------------------------------------------------------------------------------------------------------------------------------------------------------------------------------------------------------------------------------------------------------------------------------------------------------------------------------------------------------------------------------------------------------------------------------------------------------------------------------------------------------------------------------------------------------------------------------------------------------------------------------------------------------------------------------------------------------------------------------------------------------------------------------------------------------------------------------------------------------------------------------------------------------------|
